# Supplementary material for: Cyanide-bridged 1D Mn(iii)–Fe(iii) bimetallic complexes: synthesis, crystal structure and magnetic properties
Source: Royal Society of Chemistry journal article supplement (doi:10.1039/b9nj00316a), 2009-01-01
Supplement: b9nj00316a.pdf [file b9nj00316a.pdf]

## Supporting Information

### Cyanide-bridged 1D Mn(III)-Fe(III) bimetallic complexes: synthesis, crystal structure and magnetic properties

Hui-Zhong Kou,\* Zhong-Hai Ni, Cai-Ming Liu, De-Qing Zhang and Ai-Li Cui

E-mail: kouhz@mail.tsinghua.edu.cn

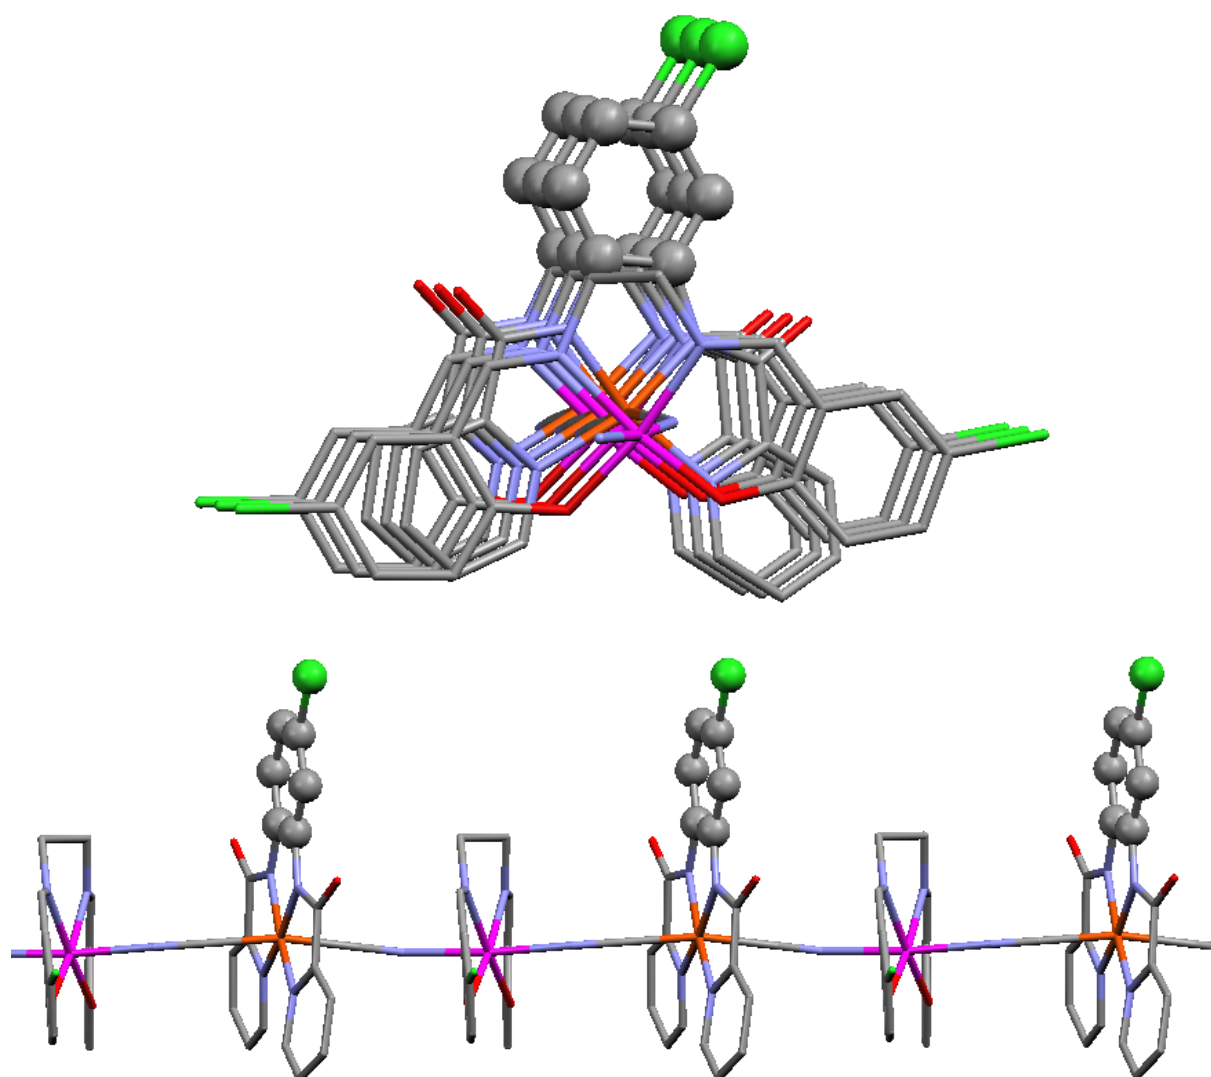

*Fig. S1.* Diagrams showing the arrangement of the bpClb<sup>2-</sup> ligands in a chain of complex **1**.

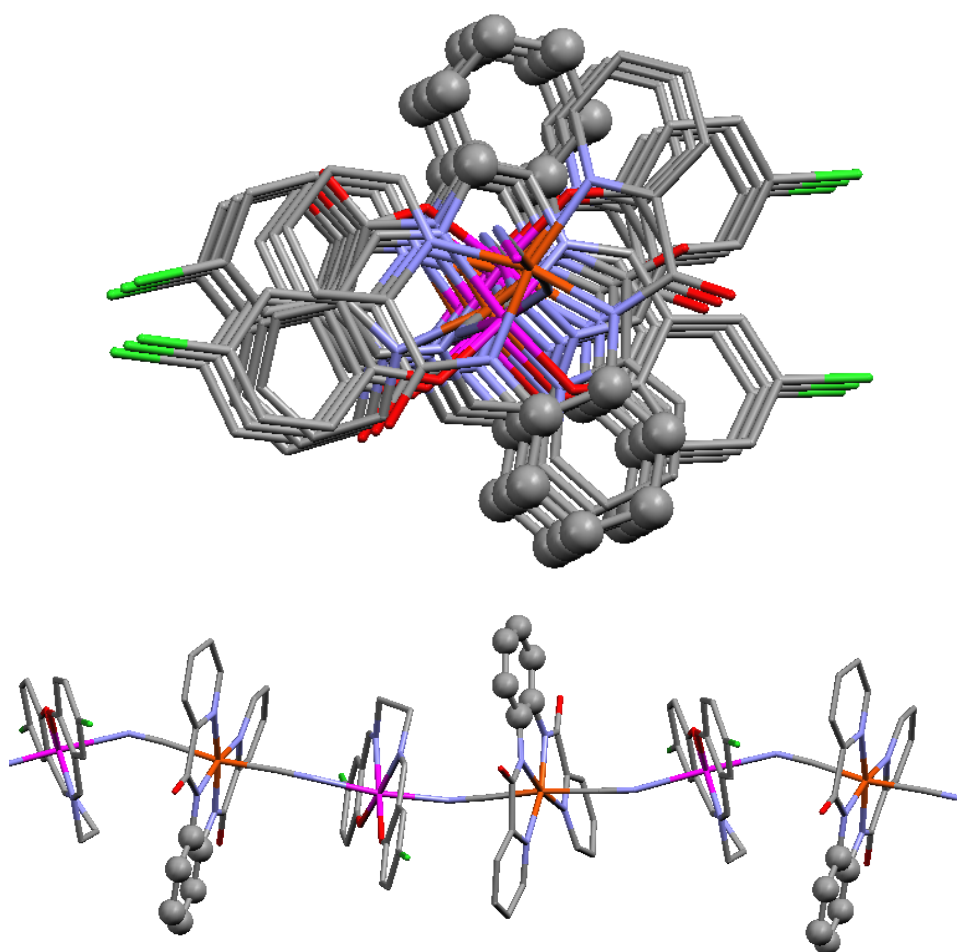

**Fig. S2.** Diagrams showing the arrangement of the  $\text{bpb}^{2-}$  ligands in a chain of complex **2**.

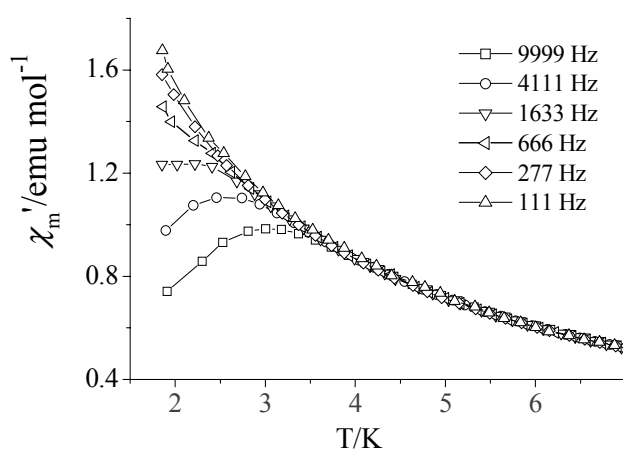

**Fig. S3.** Temperature dependence of in-phase ( $\chi'$ ) ac magnetic susceptibility measured under the dc magnetic field of zero for complex **4**.
